# Supplementary material
Source: publisher site journal article supplement (https://static.cambridge.org/content/id/urn:cambridge.org:id:article:S0317167120000505/resource/name/S0317167120000505supp001.docx)
Supplement: Supplementary file 1 [file S0317167120000505supp001.docx]

1. **Do you treat children with epilepsy?**
   1. Yes
   2. No
      *The rest of the questionnaire will not appear if the answer to question #1 Is no*
2. **How many children with epilepsy are you following in total (estimate)? _____**
3. **How many of your pediatric epilepsy patients are *currently* treated with cannabinoids (estimate)?**

n = _____
*Q4 & 5 will not appear if participants answer 0*

1. **In your experience, what percentage of children with epilepsy, treated with cannabinoids, had a reduction in seizure frequency?**
   1. 66-100%
   2. 33-65%
   3. 1-32%
   4. None
   5. Unsure
2. **In your experience, what percentage of children with epilepsy, treated with cannabinoids, suffered side effects?**
   1. 66-100%
   2. 33-65%
   3. 1-32%
   4. None
   5. Unsure
3. **What makes you hesitant to use cannabinoids in children with epilepsy**? *Select all that apply.*
   1. Difficulties authorizing it or finding an outside authorizer
   2. Medical-legal concerns
   3. Cost
   4. Poor quality control
   5. Risk of addiction
   6. Side effects
   7. Young age
   8. Non-drug-resistant epilepsy
   9. Poor evidence
   10. Other (please specify):______________________________________________________
   11. None – no hesitations
4. **How do you authorize cannabinoids in children with epilepsy?**
   1. I authorize cannabinoids myself
   2. I refer for authorization:
      1. To a hospital-based neurologist
      2. To a community-based neurologist
      3. To a hospital-based non-neurologist
      4. To a community-based non-neurologist
   3. I do not authorize or refer for authorization:
      1. I plan to do so in the near future
      2. I do not plan to do so in the near future

Questions 8 and 9 will appear if the answer to #7 is B

1. **On average, how many months does it take a patient to get an appointment with a medical cannabis authorizer?** __
2. **Following the outside physician’s authorization, do you modify the cannabinoid dosage**?
   1. Yes
   2. No, dose adjustments are only done by the medical cannabis authorizer
   3. Varies from patient to patient

Questions 10-15 will appear if the answer to #7 is A or B

1. **Which type of medical cannabis are your pediatric patients taking**? *(select all that apply)*
   1. CBD (cannabidiol) without THC (tetrahydrocannabinol)
   2. THC and CBD combined: ratio range:
      1. Please state the ratio of THC to CBD that your patients take in the form of a range: *Ex. “From 2 THC: 100 CBD up to 4 THC: 100 CBD”*
      2. I am unsure
   3. THC without CBD
   4. Unsure
2. **If readily available, which type of medical cannabis would you prefer as treatment for your pediatric patients with epilepsy**?
   1. CBD (cannabidiol) without THC (tetrahydrocannabinol)
   2. THC and CBD combined
   3. THC without CBD
   4. I have no preference

because: _______________________________________________________

1. **For which diagnoses would you consider authorizing cannabinoids**? *(select all that apply)*
   1. Dravet syndrome
   2. Lennox-Gastaut syndrome
   3. Idiopathic generalized epilepsy
   4. Focal epilepsy
   5. Other (please specify): _______________________________________________________________
2. **When would you consider authorizing cannabinoids as a treatment of epilepsy**?
    a. As a first-line treatment

b. After ___ failed anticonvulsants

1. **How are your pediatric epilepsy patients using cannabinoids?** *(select all that apply)*
   1. As an anticonvulsant
   2. As a PRN for seizure abortion
2. **Starting at what age would you typically consider cannabinoids as a treatment for epilepsy**?
   1. ___ years

All participants will receive the rest of the questions regardless of their previous answers

1. **How confident are you in the quality control of medical cannabis in Canada**?
   1. Confident
   2. Not confident
   3. Unsure
2. **In your opinion, is there evidence to treat selected children with epilepsy with cannabinoids**?
   1. Sufficient evidence
   2. Insufficient evidence
   3. Unsure

DEMOGRAPHIC QUESTIONS *(all optional)*

1. **How many years have you been practicing for**? ______
2. **Have you completed a fellowship in epileptology or equivalent training**?
   1. Yes
   2. No
3. **How many pediatric neurologists work at your institution**? ___________
4. **Please select your city and institution**:
   1. My institution does not appear here
   2. Calgary, AB: Alberta Children’s Hospital
   3. Edmonton, AB: Stollery Children’s Hospital
   4. Halifax, NS: IWK Health Centre
   5. Hamilton, ON: McMaster Children’s Hospital
   6. Kingston, ON: Kingston General Hospital
   7. London, ON: Children’s Hospital at London Health Sciences Centre
   8. Montreal, QC: Centre Hospitalier Universitaire Sainte-Justine
   9. Montreal, QC: Montreal Children’s Hospital
   10. Ottawa, ON: Children’s Hospital of Eastern Ontario
   11. Quebec City, QC: Centre Hospitalier de L'Université Laval
   12. Saint John, NB: Saint John Regional Hospital
   13. Saskatoon, SK: Royal University Hospital
   14. Sherbrooke, QC: Centre Hospitalier Universitaire de Sherbrooke
   15. St. John’s, NL: Janeway Children’s Health and Rehabilitation Centre
   16. Toronto, ON: SickKids (The Hospital for Sick Children)
   17. Vancouver, BC: BC Children’s Hospital
   18. Winnipeg, MB: Health Sciences Centre (Winnipeg Children’s Hospital)
   19. Private practice

***if the participant selected “private practice”:* If you feel comfortable, please name your institution: ______**

Questions 7 and 8 will appear on a separate secure page, not linked to the above survey results

1. **Would you consent to being contacted by e-mail in order to discuss the current practice of CBD treatment at your center, and future collaborations**?
   1. No
   2. Yes: e-mail: _________________
2. **Would you like to be contacted with the results of this study**?
   1. No
   2. Yes, via e-mail: ___________________________ or via: ________________________________
